# Supplementary material for: Fibrolytic vaccination against ADAM12 reduces desmoplasia in preclinical pancreatic adenocarcinomas
Source: PubMed Central journal article supplement (PMC11628623; doi:10.1038/s44321-024-00157-4), 2024-10-30
Supplement: 44321_2024_157_MOESM1_ESM.pdf [file 44321_2024_157_MOESM1_ESM.pdf]

## Table of Contents

|                                |          |
|--------------------------------|----------|
| <b>Appendix Figure S1.....</b> | <b>2</b> |
| <b>Appendix Figure S2.....</b> | <b>4</b> |

# Appendix Figure S1

**A**

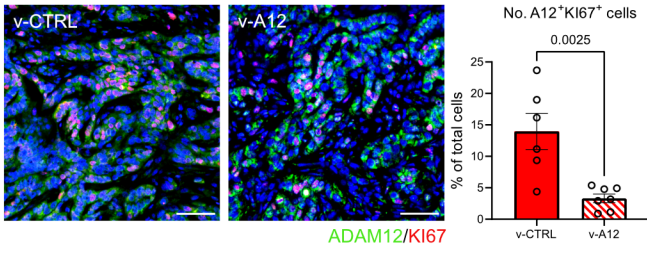

**B**

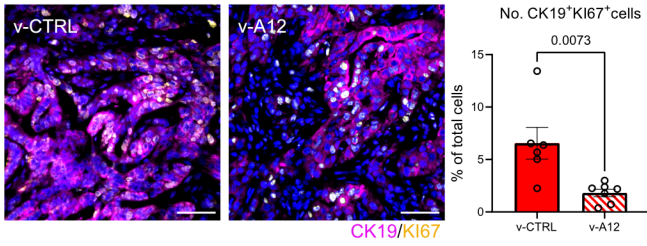

**C**

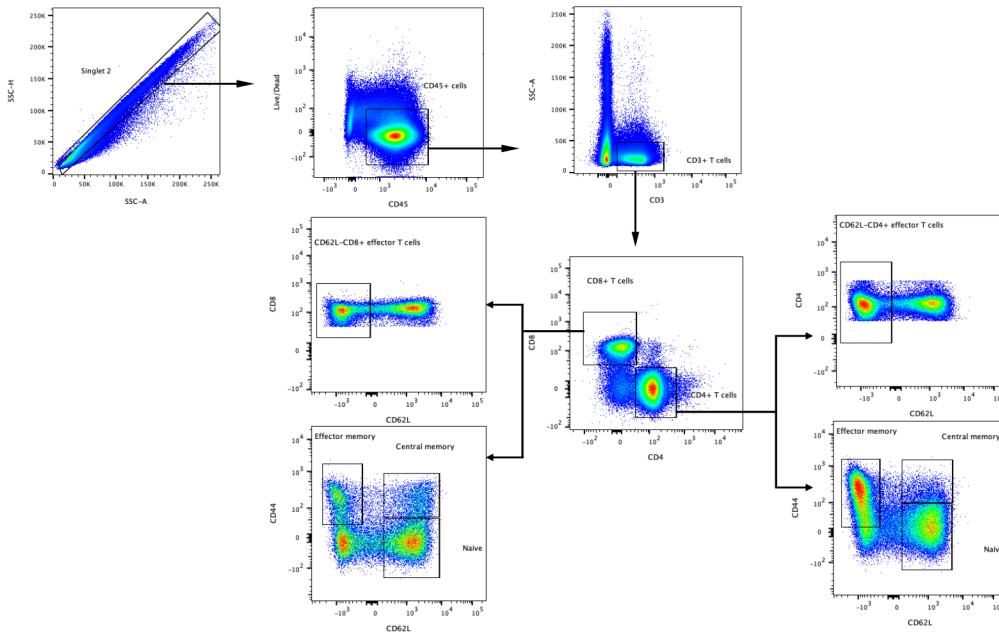

**Appendix Figure S1. Prophylactic ADAM12 vaccination limited cell proliferation on subcutaneous KP2 PDAC tumor.**

(A) Representative images (left) and quantitative analysis of proliferating (KI67<sup>+</sup>) ADAM12<sup>+</sup> cells on PDAC tumors from v-CTRL and v-A12. (n= 6 mice in v-CTRL, n=7 mice in v-A12. Data are presented as mean  $\pm$  SEM. Statistical test: unpaired two-tailed Student's t-test. Scale bar 50  $\mu$ m)

(B) Representative images (left) and quantitative analysis of proliferating (KI67<sup>+</sup>) tumor (CK19<sup>+</sup>) cells on PDAC tumors from v-CTRL and v-A12 mice. (n=6 mice in v-CTRL, n=7 mice in v-A12. Data are presented as mean  $\pm$  SEM. Statistical test: unpaired two-tailed Student's t-test. Scale bar 50  $\mu$ m)

(C) Flow cytometry gating strategy of naïve, CD62L<sup>-</sup> effector CD4<sup>+</sup> T cells and CD8<sup>+</sup> T cells. CD4<sup>+</sup> T cells were identified as CD45<sup>+</sup>CD3<sup>+</sup>CD4<sup>+</sup> cells, and CD8<sup>+</sup> T cells as CD45<sup>+</sup>CD3<sup>+</sup>CD8<sup>+</sup> cells. For naïve CD4<sup>+</sup> and CD8<sup>+</sup> T cells, they were defined as CD62L<sup>+</sup>CD44<sup>-</sup> CD4<sup>+</sup> T cells or CD62L<sup>+</sup>CD44<sup>-</sup>CD8<sup>+</sup> T cells. For effector CD4<sup>+</sup> and CD8<sup>+</sup> T cells, they were defined as CD62L<sup>-</sup>CD4<sup>+</sup> T cells and CD62L<sup>-</sup>CD8<sup>+</sup> T cells, respectively.

# Appendix Figure S2

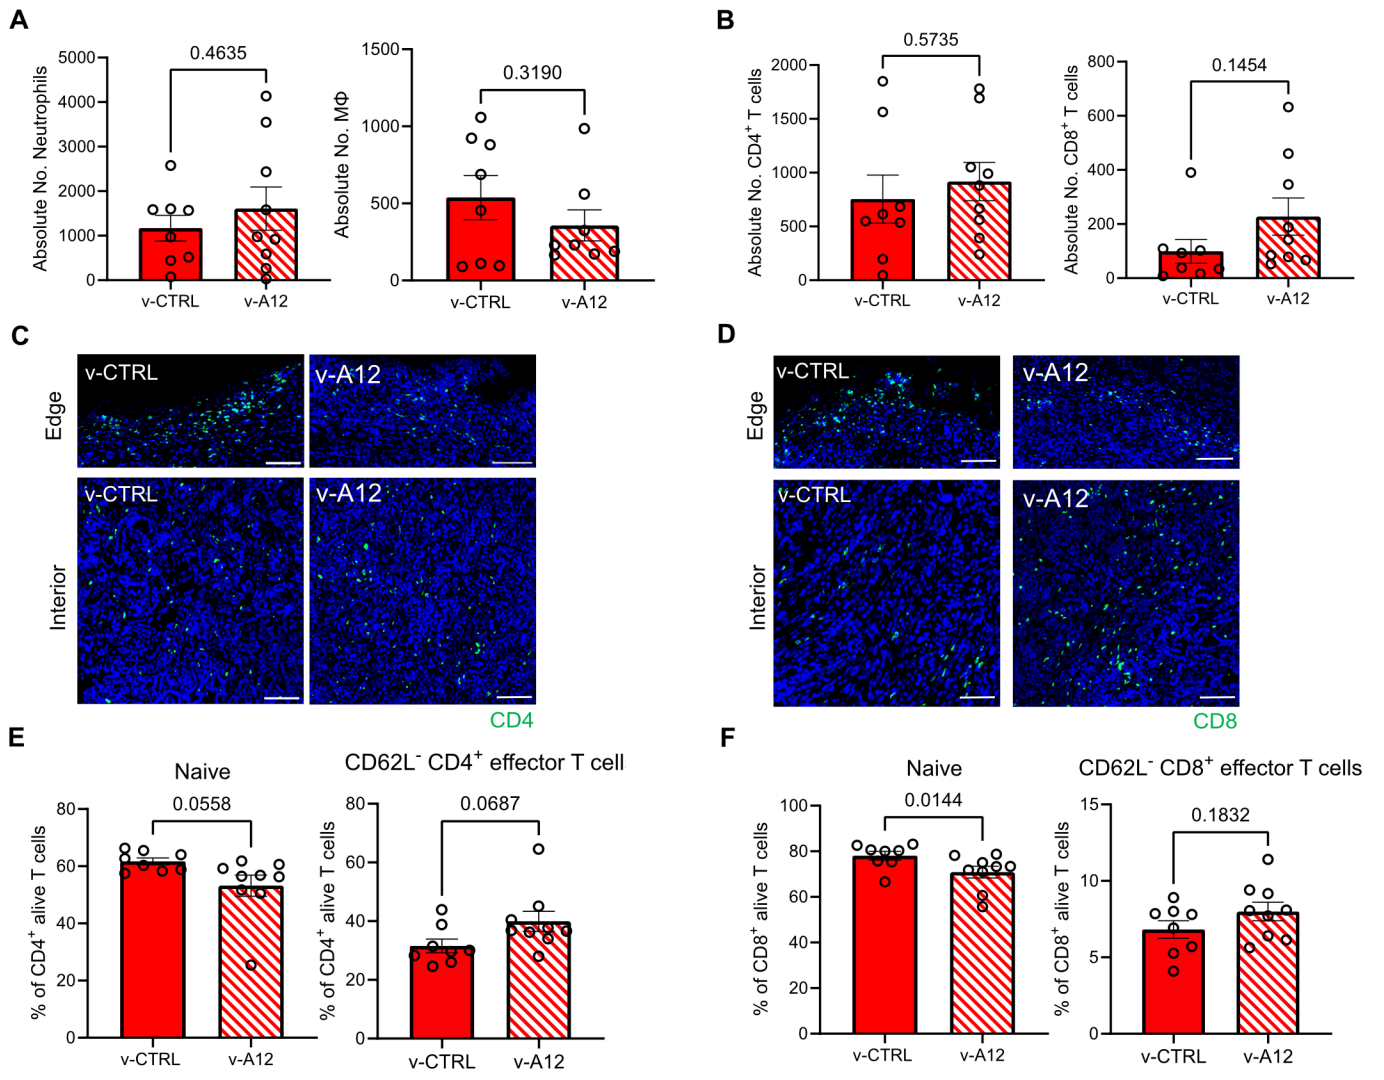

**Appendix Figure S2. FACS analysis of spleens and PDAC tumors from mice with therapeutic ADAM12 vaccination.**

(A) Quantitative analysis of the absolute number of neutrophils (left) and macrophages (right) within PDAC tumor tissues from control-vaccinated mice (v-CTRL) and ADAM12-vaccinated mice (v-A12). (For neutrophils, n=8 mice in v-CTRL, n=9 mice in v-A12; for macrophages, n=8 mice in v-CTRL, n=8 mice in v-A12. Data are presented as mean  $\pm$  SEM. Statistical test: unpaired two-tailed Student's t-test.)

(B) Quantitative analysis of the absolute number of CD4<sup>+</sup> T cells (left) and CD8<sup>+</sup> T cells (right) within PDAC tumor tissues from control-vaccinated mice (v-CTRL) and ADAM12-vaccinated mice (v-A12). (n=8 mice in v-CTRL, n=9 mice in v-A12)

(C) Representative immunofluorescence staining images of CD4<sup>+</sup> T cells at the edge of the tumor tissue (upper) and CD4<sup>+</sup> T cells in the tumor tissue (bottom). (Scale bar 100  $\mu$ m)

(D) Representative immunofluorescence staining images of CD8<sup>+</sup> T cells at the edge of the tumor tissue (upper) and CD8<sup>+</sup> T cells in the tumor tissue (bottom). (Scale bar 100  $\mu$ m)

(E) Quantitative analysis via flow cytometry of naïve CD4<sup>+</sup> T cells (left) and effector/memory CD4<sup>+</sup> T cells (right) within splenic CD4<sup>+</sup> T cells from PDAC tumor-bearing mice treated with control vaccine (v-CTRL, n=8) and ADAM12 vaccine (v-A12, n=9). (n=8 mice in v-CTRL, n=9 mice in v-A12. Data are presented as mean  $\pm$  SEM. Statistical test: unpaired two-tailed Student's t-test.)

(F) Quantitative analysis via flow cytometry of naïve CD8<sup>+</sup> T cells (left) and effector/memory CD8<sup>+</sup> T cells (right) within splenic CD8<sup>+</sup> T cells from PDAC tumor-bearing mice therapeutically treated with control vaccine (v-CTRL) and ADAM12 vaccine (v-A12). (n=8 mice in v-CTRL, n=9 mice in v-A12. Data are presented as mean  $\pm$  SEM. Statistical test: unpaired two-tailed Student's t-test.)
