# Supplementary material for: Fibrolytic vaccination against ADAM12 reduces desmoplasia in preclinical pancreatic adenocarcinomas
Source: PubMed Central journal article supplement (PMC11628623; doi:10.1038/s44321-024-00157-4), 2024-10-30
Supplement: 44321_2024_157_MOESM7_ESM.pdf [file 44321_2024_157_MOESM7_ESM.pdf]

## Expanded View Figures

**Figure EV1. ADAM12 expression and characterization on KP2 PDAC tumor tissue.**

(A) Representative image of ADAM12 immunofluorescence staining (ADAM12 antibody, Invitrogen, PA5-50594) on the healthy pancreas and PDAC tumor tissue from KPPC transgenic mice. (Scale bar 100  $\mu\text{m}$ ). (B) Representative images of Sirius Red/Fast Green staining on subcutaneous KP2 PDAC sections from v-CTRL mice and v-A12 mice. (Scale bar 100  $\mu\text{m}$ ). (C) Representative image of ADAM12 immunostaining (ADAM12 antibody, Invitrogen, PA5-50594) on PDAC tumor sections from subcutaneous KP2 PDAC grafts. (Scale bar 100  $\mu\text{m}$ ; for the zoom-in picture, the scale bar is 50  $\mu\text{m}$ ). (D) Representative images (left) and quantitative analysis (right) of ADAM12<sup>+</sup> cell characterization, ADAM12<sup>+</sup> CAFs were indicated as ADAM12<sup>+</sup>/ $\alpha$ -SMA<sup>+</sup> (upper, left) and ADAM12<sup>+</sup>/PDGFR- $\beta$ <sup>+</sup> (middle, left), and ADAM12<sup>+</sup> tumor cells were indicated as ADAM12<sup>+</sup>/CK19<sup>+</sup> (bottom, left) co-expression on subcutaneous KP2 PDAC tumors. ( $n = 12$  fields of view from four mice. Data were presented as mean  $\pm$  SEM. Scale bar is 200  $\mu\text{m}$ , and the scale bar of the zoomed-in picture is 50  $\mu\text{m}$ ). (E) Vector maps of CTRL vaccine (v-CTRL) and ADAM12 vaccine (v-A12). (F) Quantitative analysis of ADAM12<sup>+</sup>/ $\alpha$ -SMA<sup>+</sup> (left, left), ADAM12<sup>+</sup>/PDGFR- $\beta$ <sup>+</sup> (left, middle), and ADAM12<sup>+</sup>/CK19<sup>+</sup> (left, right) co-expression on PDAC tumors from control-vaccinated mice (v-CTRL) and ADAM12-vaccinated mice (v-A12). Data were represented as the number of cells per high power field (HPF). Representative double positive cells were indicated by white arrows respectively. ( $n = 12-16$  in v-CTRL,  $n = 8-9$  in v-A12. Data were presented as mean  $\pm$  SEM. Statistical test: multiple  $t$ -test. Scale bar 50  $\mu\text{m}$ ).

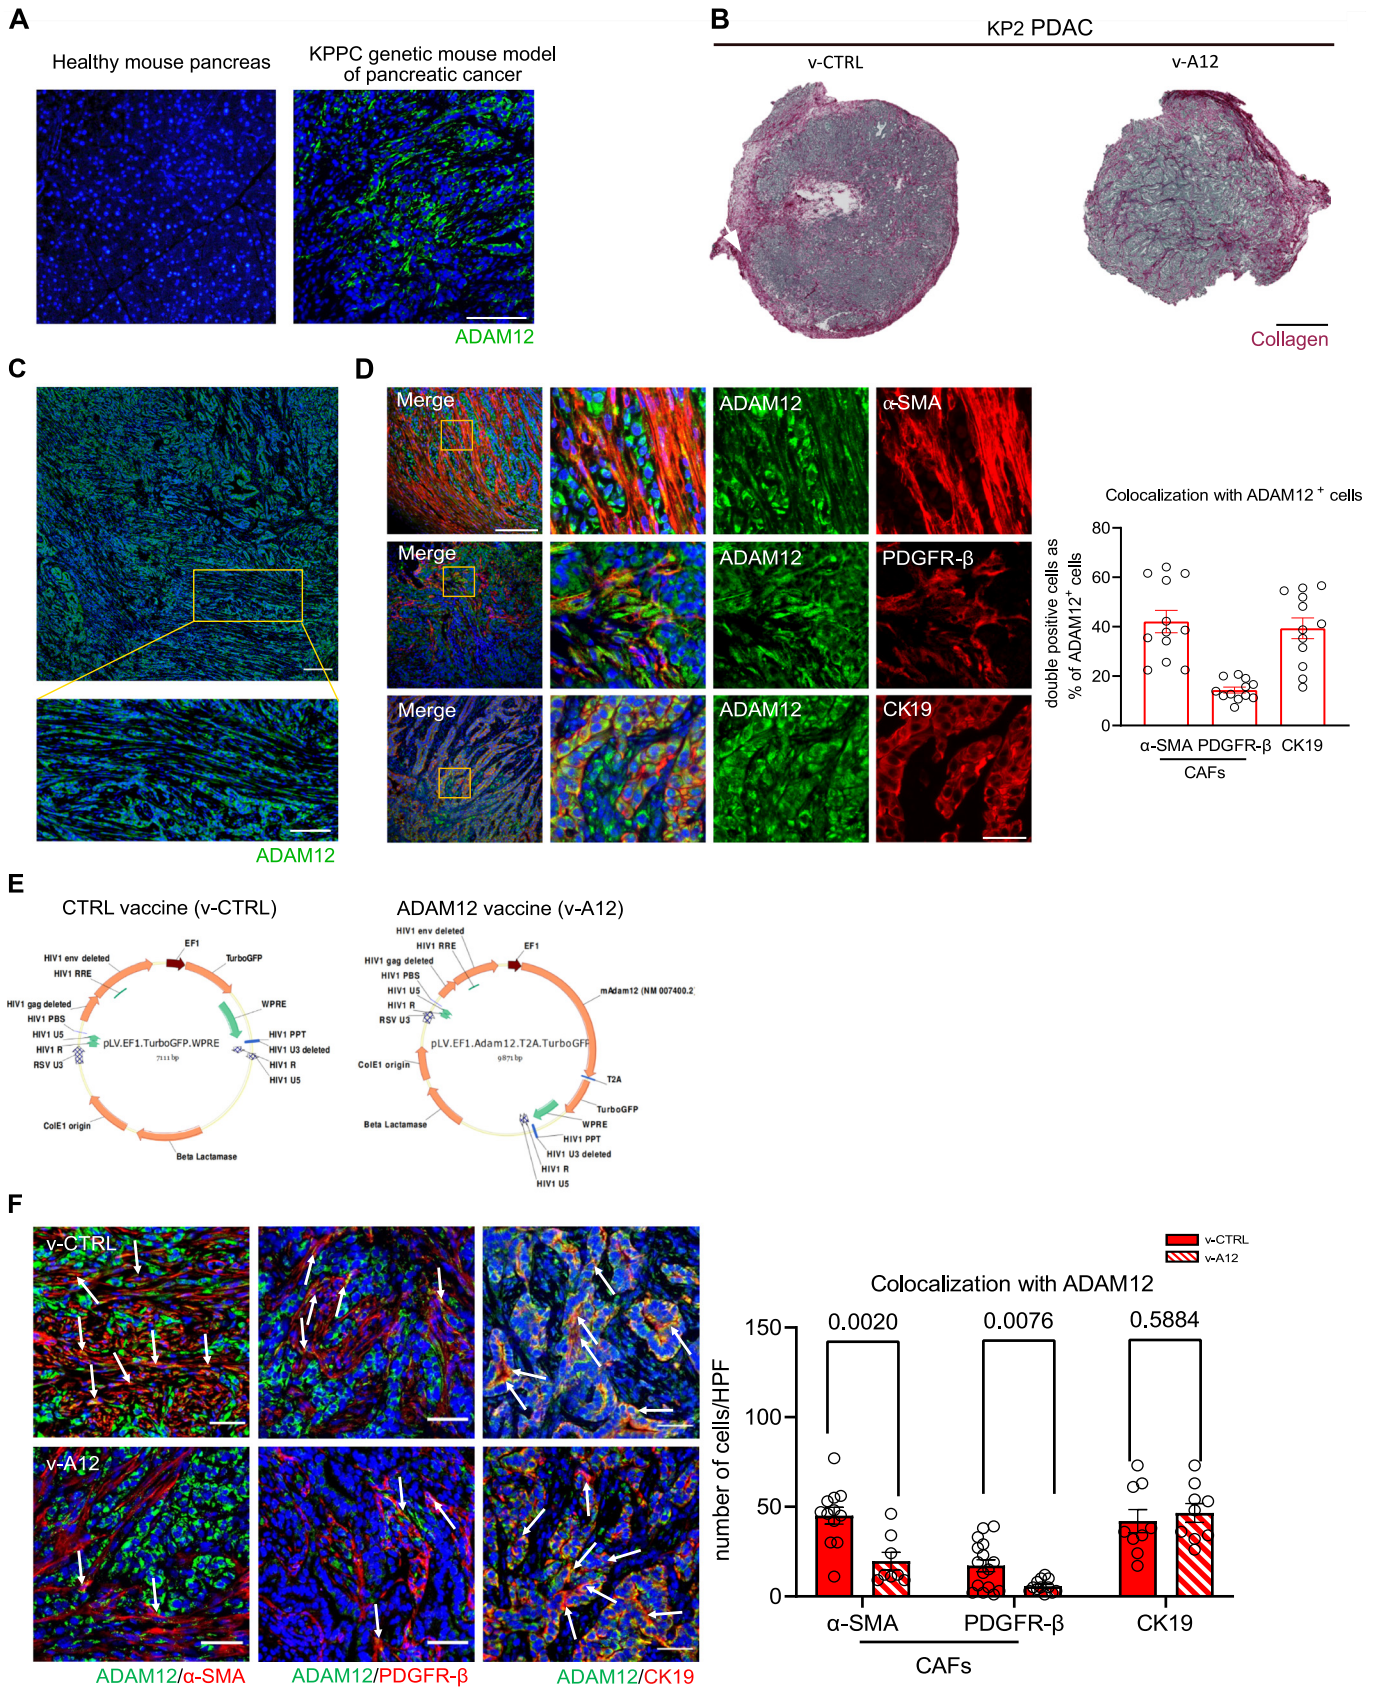

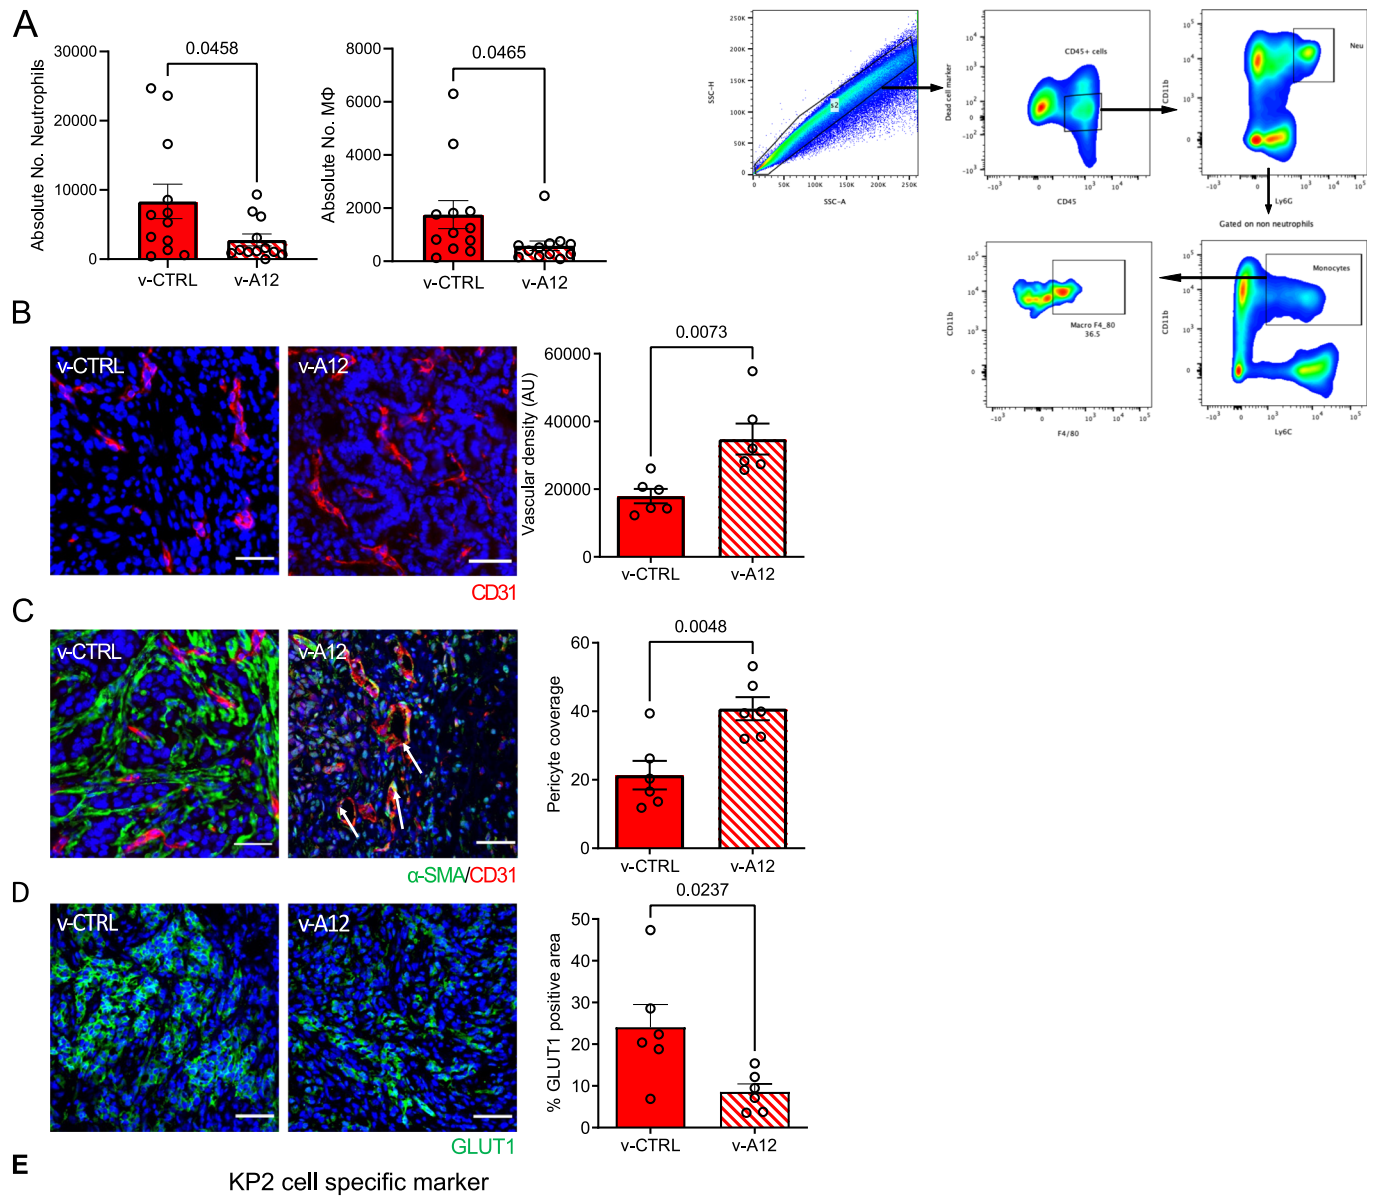

**◀ Figure EV2. Prophylactic ADAM12 vaccination increased tumor vascular density and pericyte coverage.**

(A) Quantitative analysis of the absolute number of neutrophils (left) and macrophages (middle) within PDAC tumor tissues from control-vaccinated mice (v-CTRL) and ADAM12-vaccinated mice (v-A12); corresponding flow cytometry gating strategy of myeloid cells (right): neutrophils were identified as CD45<sup>+</sup>CD11b<sup>+</sup>Ly6G<sup>+</sup> cells; monocytes were gated based on non-neutrophils (negative gating), and then identified as CD11b<sup>+</sup>Ly6C<sup>+</sup> population. Then, monocyte macrophages were further defined with an F4/80<sup>+</sup> signal. (*n* = 12 mice in v-CTRL, *n* = 12 mice in v-A12. Data were presented as mean ± SEM. Statistical test: unpaired two-tailed Student's *t*-test). (B) Representative immunofluorescence staining images (left) and quantitative analysis of CD31-positive endothelial cells (right) on PDAC tumors from mice treated with either control vaccine (v-CTRL) or ADAM12 vaccine (v-A12). (*n* = 6 mice in v-CTRL, *n* = 6 mice in v-A12. Data were presented as mean ± SEM. Statistical test: unpaired two-tailed Student's *t*-test. Scale bar 50 μm). (C) Representative immunofluorescence staining images (left) and quantitative analysis of pericyte coverage assessed by α-SMA/CD31 co-localization on PDAC tumors with either control vaccine (v-CTRL) or ADAM12 vaccine (v-A12) and representative images of α-SMA/CD31 immunostaining. (*n* = 6 mice in v-CTRL, *n* = 6 mice in v-A12. Data were presented as mean ± SEM. Statistical test: unpaired two-tailed Student's *t*-test. Scale bar 50 μm). (D) Representative immunofluorescence staining images (left) and quantitative analysis of tumor hypoxia via GLUT1-positive cells on subcutaneous PDAC from v-CTRL mice and v-A12 mice together with representative images of GLUT1 immunostaining. (*n* = 6 mice in v-CTRL, *n* = 6 mice in v-A12. Data were presented as mean ± SEM. Statistical test: unpaired two-tailed Student's *t*-test. Scale bar 50 μm). (E) Gene expression analysis of the KP2-specific gene CK19 in peripheral blood at endpoint (day 28 post tumor inoculation) from subcutaneous PDAC mouse model with control vaccine (v-CTRL) or ADAM12 vaccine (v-A12). (*n* = 5 mice in v-CTRL, *n* = 5 mice in v-A12. Data were presented as mean ± SEM. Statistical test: unpaired two-tailed Student's *t*-test).



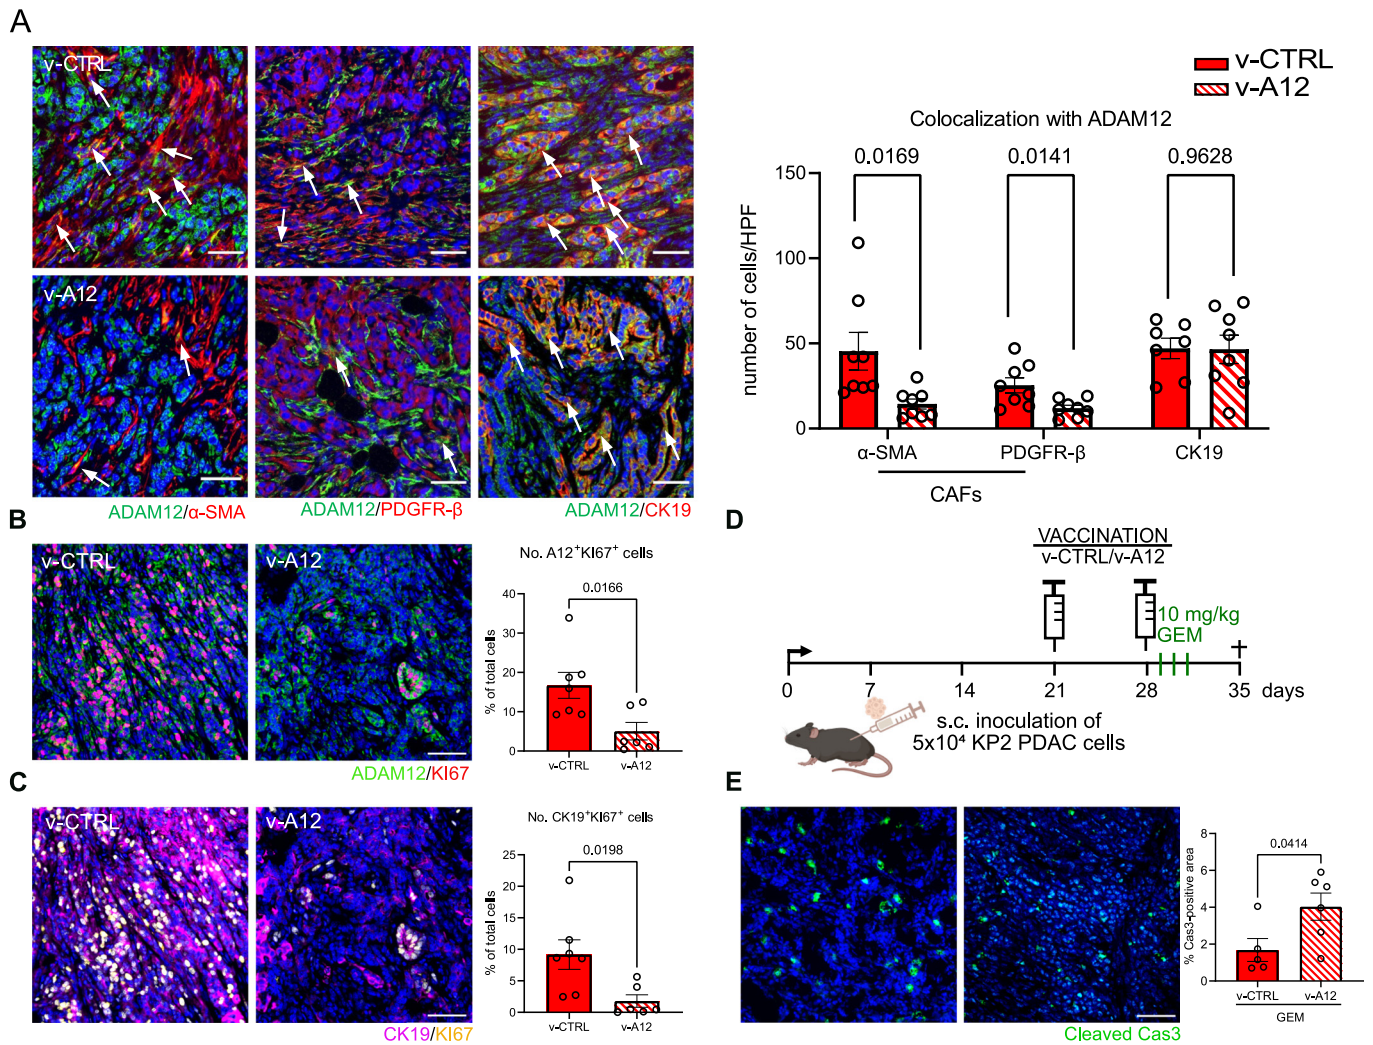

**Figure EV3. Therapeutic ADAM12 vaccination targets ADAM12<sup>+</sup> CAFs and inhibits cell proliferation in subcutaneous PDAC tumors.**

(A) Representative immunofluorescence staining images (left) and quantitative analysis (right) of ADAM12<sup>+</sup>/α-SMA<sup>+</sup> (left, left), ADAM12<sup>+</sup>/PDGFR-β<sup>+</sup> (left, middle), and ADAM12<sup>+</sup>/CK19<sup>+</sup> (left, right) co-expression on PDAC tumors from control-vaccinated mice (v-CTRL) and ADAM12-vaccinated mice (v-A12). Data were represented as the number of cells per high power field. Representative double positive cells were indicated by white arrows respectively. ( $n = 7-8$  mice in v-CTRL,  $n = 8$  mice in v-A12). Data were presented as mean  $\pm$  SEM. Statistical test: multiple  $t$ -test. Scale bar 50  $\mu$ m). (B) Representative immunofluorescence images (left) and quantitative analysis (right) of proliferating (Ki67<sup>+</sup>) ADAM12<sup>+</sup> cells on PDAC tumors from v-CTRL mice and v-A12 mice. ( $n = 7$  mice in v-CTRL,  $n = 6$  mice in v-A12). Data were presented as mean  $\pm$  SEM. Statistical test: unpaired two-tailed Student's  $t$ -test. Scale bar 50  $\mu$ m). (C) Representative immunofluorescence staining images (left) and quantitative analysis (right) of proliferating (Ki67<sup>+</sup>) tumor (CK19<sup>+</sup>) cells on PDAC tumors from v-CTRL mice ( $n = 7$ ) and v-A12 mice ( $n = 6$ ). ( $n = 7$  mice in v-CTRL,  $n = 6$  mice in v-A12). Data were presented as mean  $\pm$  SEM. Statistical test: unpaired two-tailed Student's  $t$ -test. Scale bar 50  $\mu$ m). (D) Scheme of therapeutic vaccination with gemcitabine treatment on subcutaneous KP2 PDAC tumor-bearing mice. (E) Representative immunofluorescence images (left) and quantitative analysis (right) of apoptotic cells (cleaved caspase 3<sup>+</sup>) on PDAC tumors from v-CTRL mice and v-A12 mice. ( $n = 5$  mice in v-CTRL,  $n = 6$  mice in v-A12). Data were presented as mean  $\pm$  SEM. Statistical test: unpaired two-tailed Student's  $t$ -test. Scale bar 50  $\mu$ m).

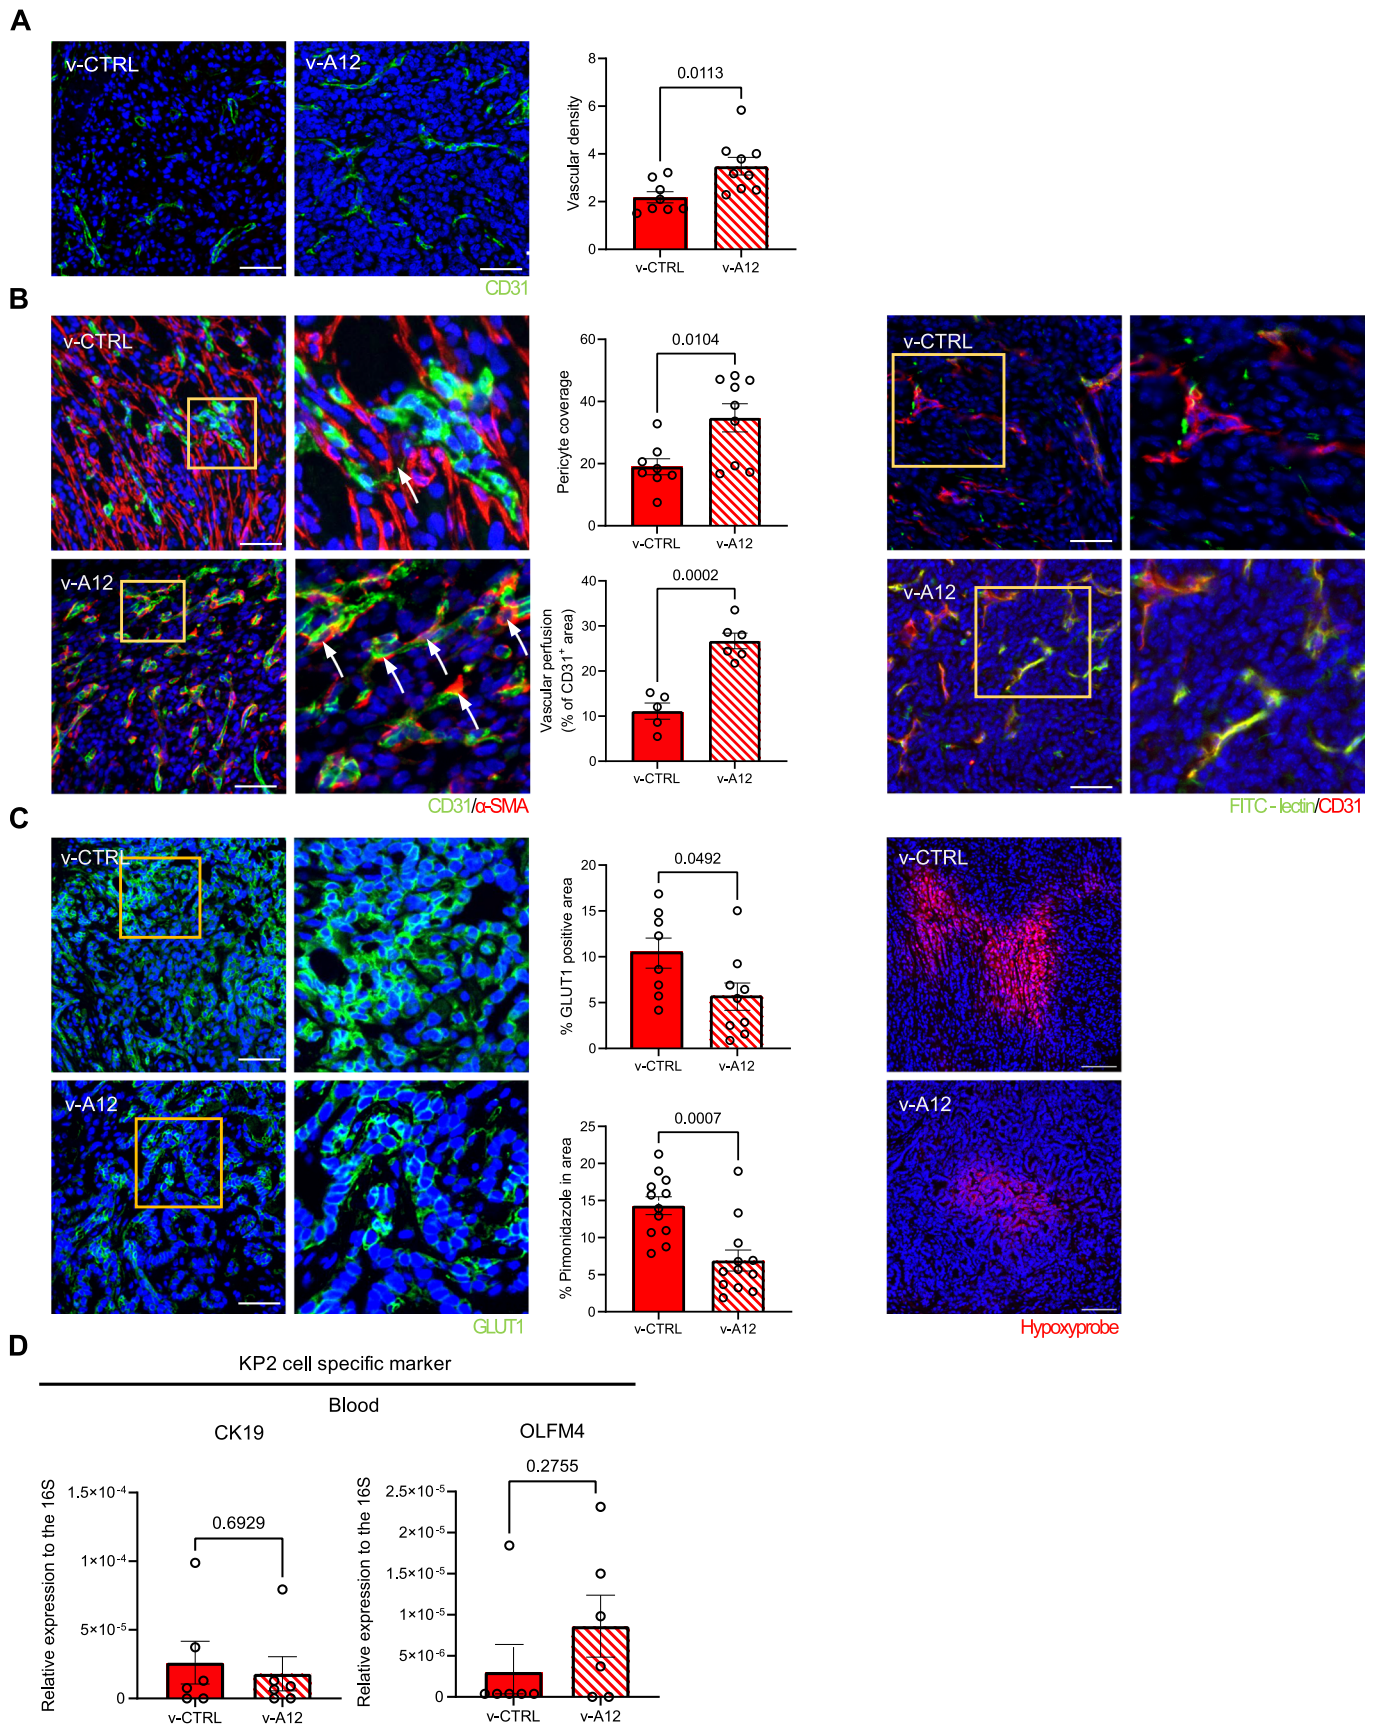

**◀ Figure EV4. Therapeutic ADAM12 vaccination increased tumor vascular density, pericyte coverage, and decreased tumor hypoxia.**

(A) Representative images of immunofluorescence staining (left) and quantitative analysis of CD31-positive endothelial cells (right) on subcutaneous PDAC tumors treated with control vaccine (v-CTRL) and ADAM12 vaccine (v-A12) together with representative images of CD31 immunostaining. ( $n = 8$  mice in v-CTRL,  $n = 9$  mice in v-A12, Data were presented as mean  $\pm$  SEM. Statistical test: unpaired two-tailed Student's *t*-test. Scale bar 100  $\mu$ m). (B) Representative images of immunofluorescence staining (left, right) and quantitative analysis of pericyte coverage (middle, upper) assessed by  $\alpha$ -SMA/CD31 co-localization (yellow) as well as vascular perfusion (middle, bottom) presented by FITC-lectin<sup>+</sup>/CD31<sup>+</sup> cells on PDAC tumors treated with control vaccine (v-CTRL) and ADAM12 vaccine (v-A12). Representative pericytes were indicated by white arrows respectively. (Pericyte coverage:  $n = 8$  mice in v-CTRL,  $n = 9$  mice in v-A12; vascular perfusion:  $n = 5$  mice in v-CTRL,  $n = 6$  mice in v-A12. Data were presented as mean  $\pm$  SEM. Statistical test: unpaired two-tailed Student's *t*-test. Scale bar 50  $\mu$ m). (C) Representative images of immunofluorescence staining (left, right) and quantitative analysis of tumor hypoxia by GLUT1-positive cells (middle, upper) as well as by the coverage of Pimonidazole positive area (middle, bottom) on PDAC tumors from mice treated with control vaccine (v-CTRL,  $n = 8$ ) or ADAM12 vaccine (v-A12,  $n = 9$ ). (GLUT1 staining:  $n = 8$  mice in v-CTRL,  $n = 9$  mice in v-A12; Pimonidazole staining (hypoxyprobe):  $n = 12$  mice in v-CTRL,  $n = 12$  in v-A12. Data were presented as mean  $\pm$  SEM. Statistical test: unpaired two-tailed Student's *t*-test. Scale bar 100  $\mu$ m). (D) Gene expression analysis of the KP2-specific gene CK19 and OLFM4 in peripheral blood at endpoint (day 28 post tumor inoculation) from subcutaneous PDAC mouse model with control vaccine (v-CTRL) or ADAM12 vaccine (v-A12). ( $n = 5$  mice in v-CTRL,  $n = 5$  mice in v-A12. Data were presented as mean  $\pm$  SEM. Statistical test: unpaired two-tailed Student's *t*-test).



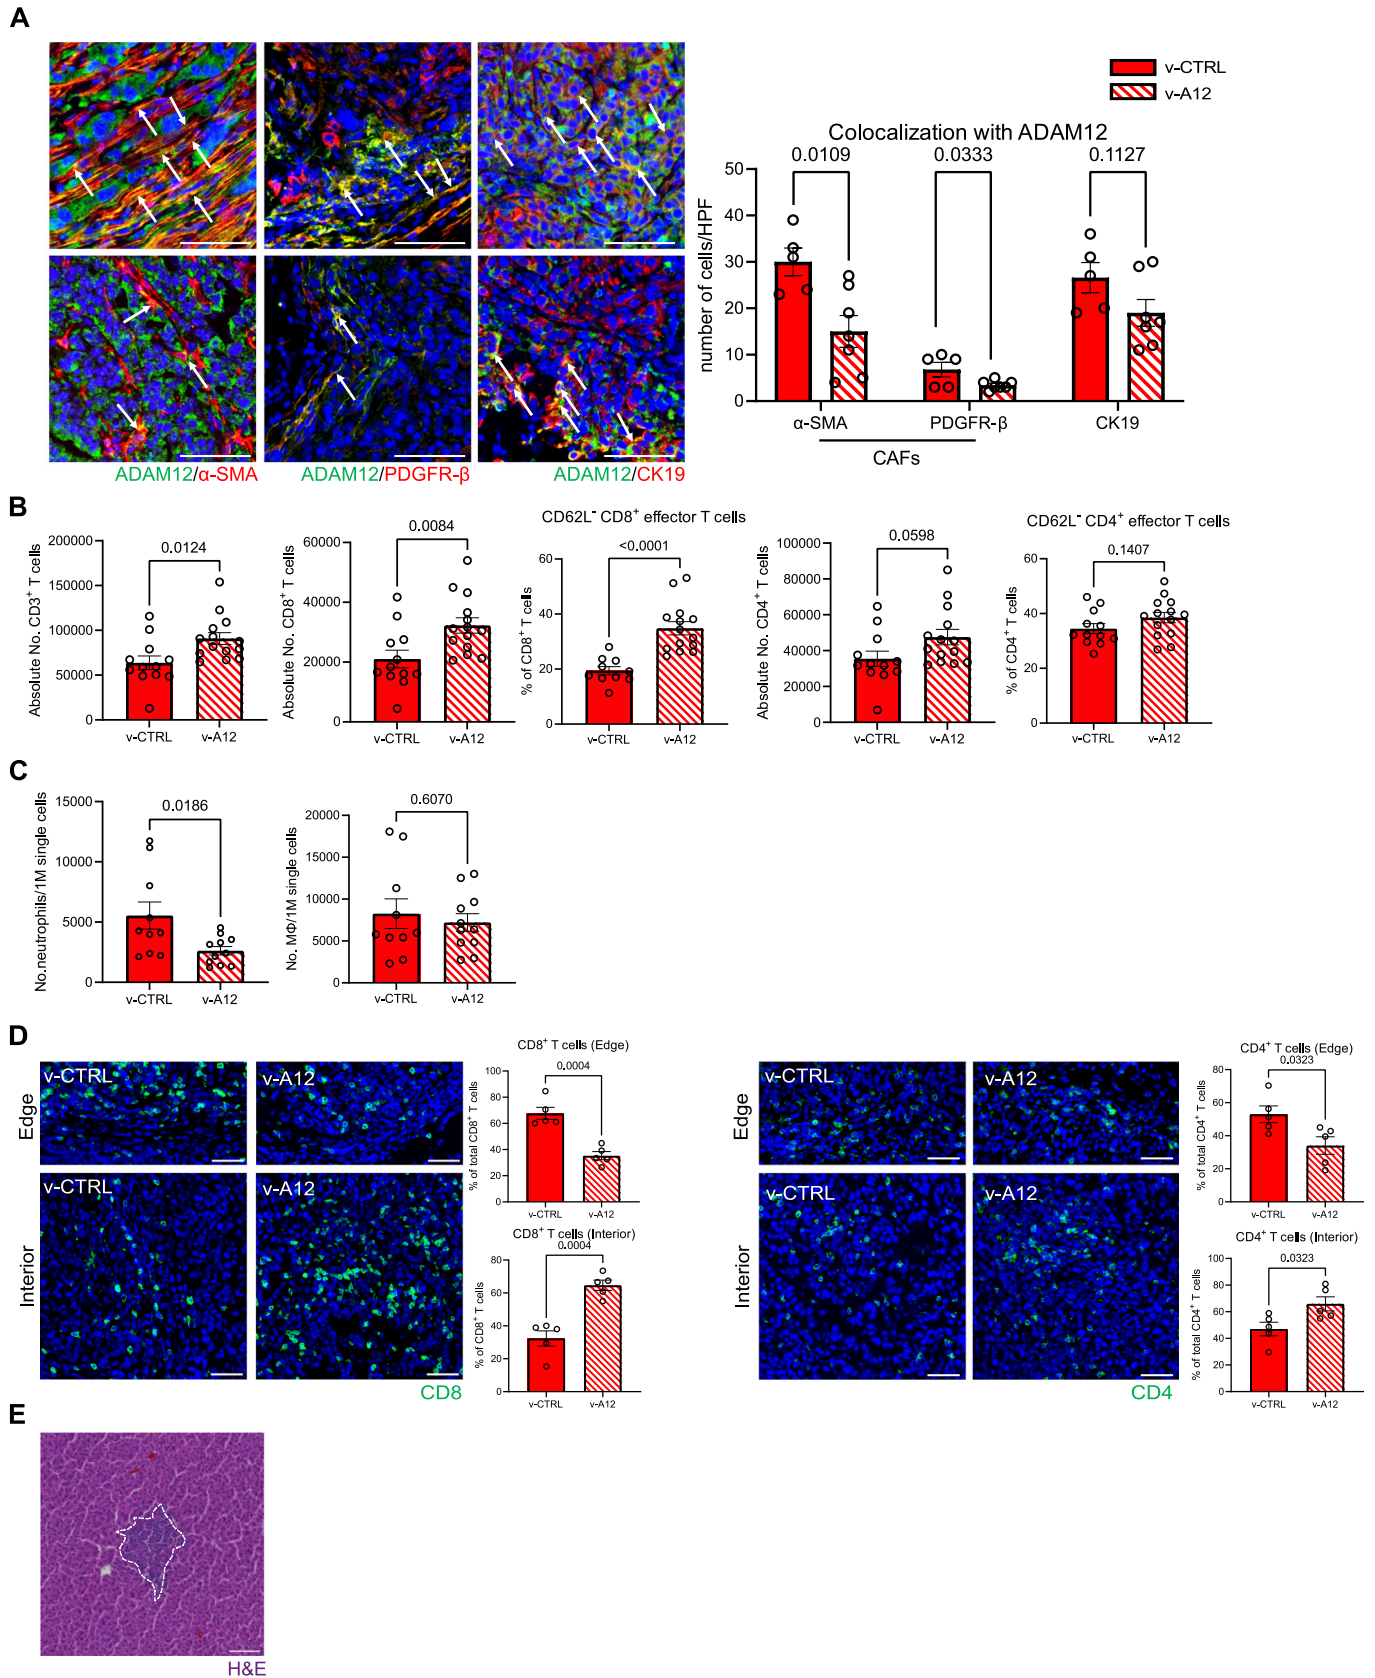



◀ **Figure EV5. Therapeutic ADAM12 vaccination in mice bearing orthotopic PDAC tumors decreased ADAM12<sup>+</sup> CAFs, stimulated splenic CD8 T cell response, and promoted T cell relocalization within the PDAC tumor tissue.**

(A) Representative immunofluorescence staining images (left) and quantitative analysis (right) of ADAM12<sup>+</sup>/α-SMA<sup>+</sup> (left, left), ADAM12<sup>+</sup>/PDGFR-β<sup>+</sup> (left, middle) and ADAM12<sup>+</sup>/CK19<sup>+</sup> (left, right) co-expression on PDAC tumors from control-vaccinated mice (v-CTRL, *n* = 5 mice) and ADAM12-vaccinated mice (v-A12, *n* = 7 mice). Data were represented as the number of cells per high power field (HPF). Representative double positive cells were indicated by white arrows respectively. (*n* = 5 in v-CTRL, *n* = 7 in v-A12. Data were presented as mean ± SEM. Statistical test: unpaired two-tailed Student's *t*-test. Scale bar 50 μm). (B) Quantitative FACS analysis of the absolute number of T cells, CD8<sup>+</sup> T cells, CD62L:CD8<sup>+</sup> effector T cells, CD4<sup>+</sup> T cells, and CD62L:CD4<sup>+</sup> effector T cells in spleens from control-vaccinated mice (v-CTRL) and ADAM12-vaccinated mice (v-A12). (*n* = 12 mice in v-CTRL, *n* = 14 mice in v-A12. \**n* = 10 mice in v-CTRL in the CD62L:CD8<sup>+</sup> effector T cell population because of two outliers. Data were presented as mean ± SEM. Statistical test: unpaired two-tailed Student's *t*-test.). (C) Quantitative analysis of the number of neutrophils (left) and macrophages (right) per 1 M single cells in PDAC tumors from control-vaccinated mice (v-CTRL) and ADAM12-vaccinated mice (v-A12). (*n* = 10 mice in v-CTRL, *n* = 11 mice in v-A12. Data were presented as mean ± SEM. Statistical test: unpaired two-tailed Student's *t*-test.). (D) Representative images of CD8<sup>+</sup> T cell (left) and CD4<sup>+</sup> T cell (right) localization, and quantitative analysis of CD8<sup>+</sup> T cell and CD4<sup>+</sup> T cell population at the edge of PDAC tumor tissue (right, upper) and the interior of PDAC tumor tissue (right, bottom). (*n* = 5 mice in v-CTRL, *n* = 5 mice in v-A12. Data were presented as mean ± SEM. Statistical test: unpaired two-tailed Student's *t*-test. Scale bar 50 μm). (E) Representative hepatic micrometastasis (area indicated within the white dotted outline) image with H&E staining, scale bar 50 μm.
